# Supplementary material for: Micellization properties of cardanol as a renewable co-surfactant
Source: Royal Society of Chemistry journal article supplement (doi:10.1039/c5ob01059d), 2015-01-01

# Micellization properties of cardanol as a renewable co-surfactant

Antonella Fontana,<sup>a,\*</sup> Susanna Guernelli,<sup>b</sup> Nelsi Zaccheroni,<sup>b</sup> Romina Zappacosta,<sup>a</sup> Damiano

Genovese,<sup>b</sup> Lucia De Crescentini,<sup>c</sup> Serena Riel<sup>d</sup>

<sup>a</sup> Dipartimento di Farmacia, Università "G. d'Annunzio", Via dei Vestini 31, 66100 Chieti, Italy.

<sup>b</sup> Dipartimento di Chimica "G. Ciamician", Università degli Studi di Bologna, Via S. Giacomo 2 and Via Selmi 2, 40126 Bologna, Italy.

<sup>c</sup> Dipartimento di Scienze Biomolecolari, Università di Urbino, Via Maggetti 24, 60129 Urbino, Italy.

<sup>d</sup> Dipartimento di Scienze e Tecnologie Biologiche, Chimiche e Farmaceutiche "STEBICEF", Università di Palermo, V.le delle Scienze, Parco d'Orleans II, Building 17, 90128, Palermo, Italy.

| Supporting Information                                      | page |
|-------------------------------------------------------------|------|
| <b>1. Spectrophotometric measurements:</b>                  |      |
| Pure SDS and <b>HC</b> containing mixtures                  | S2   |
| Pure CTAB and <b>HC</b> containing mixtures                 | S4   |
| Pure C <sub>14</sub> DMAO and <b>HC</b> containing mixtures | S6   |
| Pure Triton X-100 and <b>HC</b> containing mixtures         | S8   |
| <b>2. Surface tension measurements:</b>                     |      |
| Pure SDS and <b>HC</b> containing mixtures                  | S10  |
| Pure CTAB and <b>HC</b> containing mixtures                 | S12  |
| Pure C <sub>14</sub> DMAO and <b>HC</b> containing mixtures | S14  |
| Pure Triton X-100 and <b>HC</b> containing mixtures         | S16  |
| <b>HC</b> /SDS mixture in the presence of Orange OT         | S18  |
| <b>Table S1.</b> CMC values obtained by surface tensiometry | S19  |
| <b>3. DLS traces and correlation functions:</b>             |      |
| Pure SDS and <b>HC</b> containing mixture                   | S20  |
| Pure CTAB and <b>HC</b> containing mixture                  | S22  |
| Pure C <sub>14</sub> DMAO and <b>HC</b> containing mixture  | S24  |
| Pure Triton X-100 and <b>HC</b> containing mixture          | S26  |

# 1. Spectrophotometric measurements

## 1.1 SDS

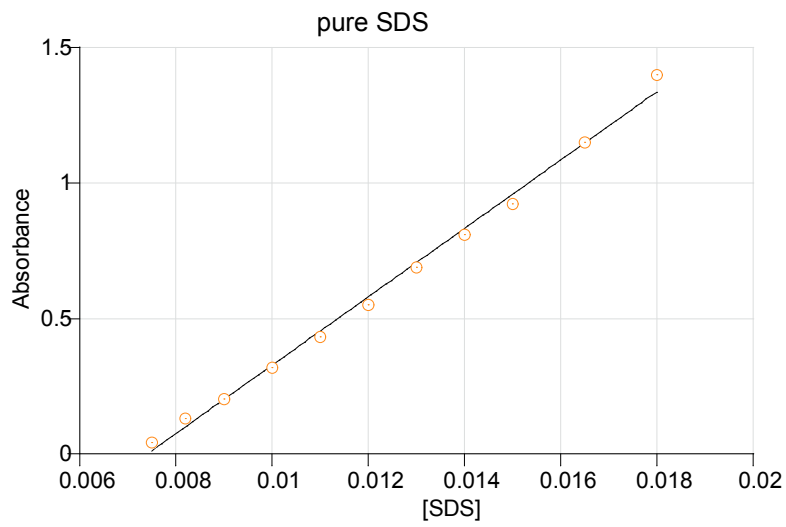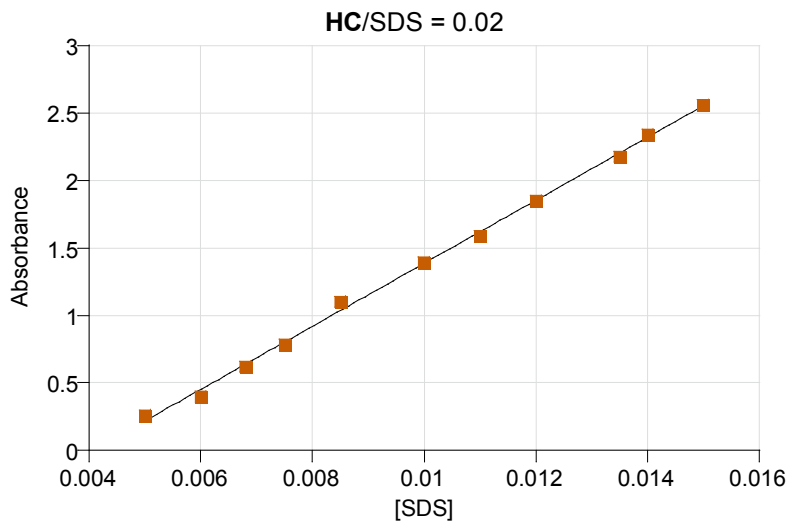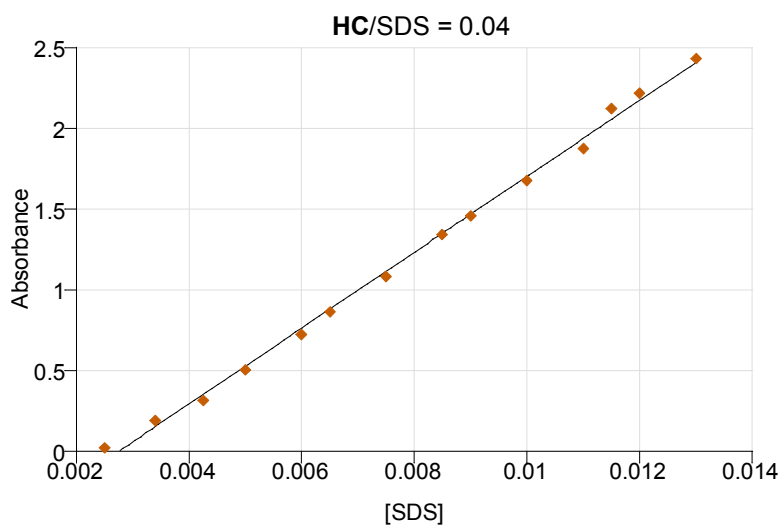

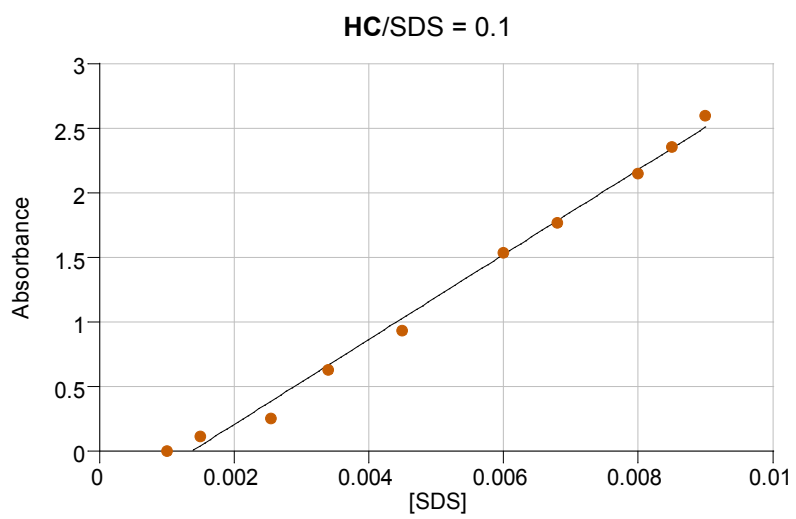

## 1.2 CTAB

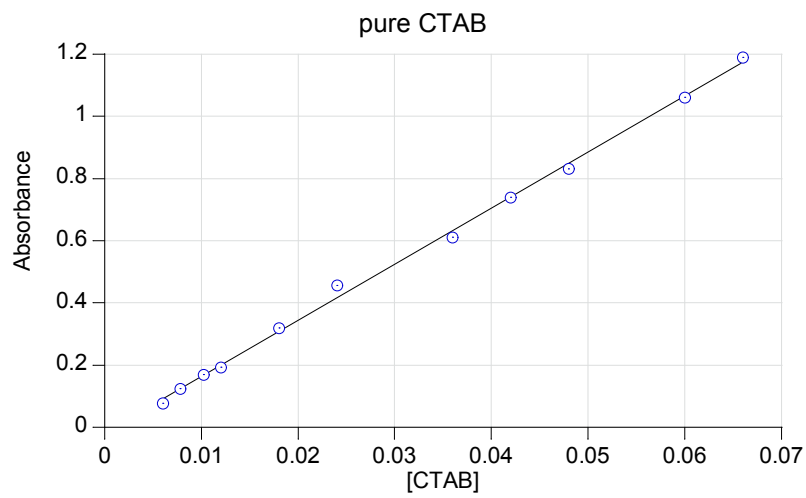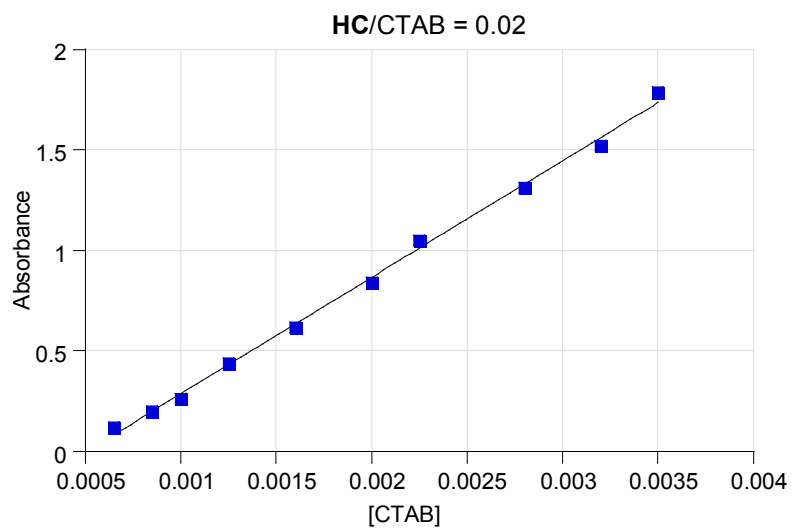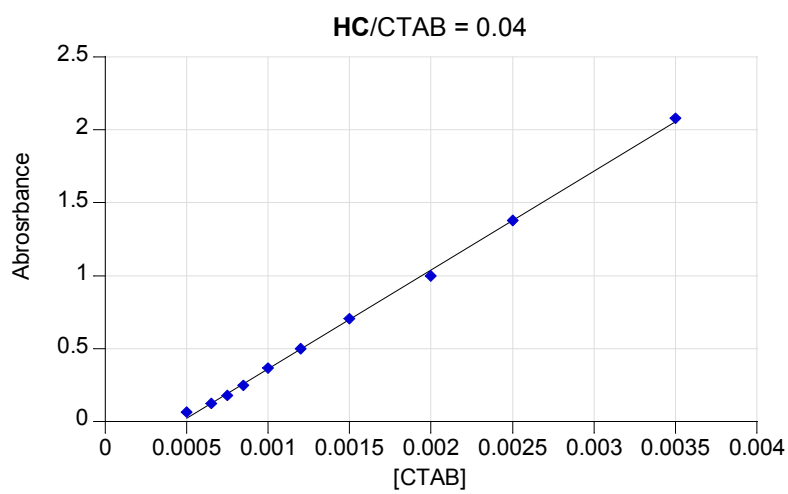

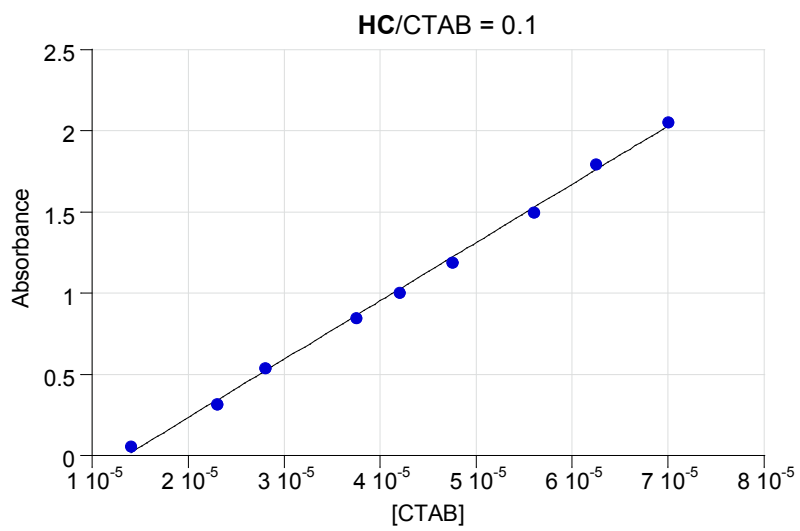

### 1.3 C<sub>14</sub>DMAO

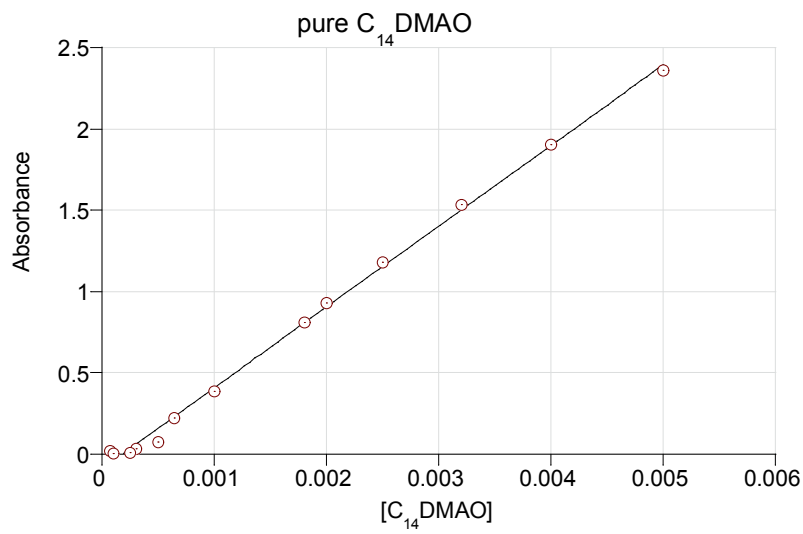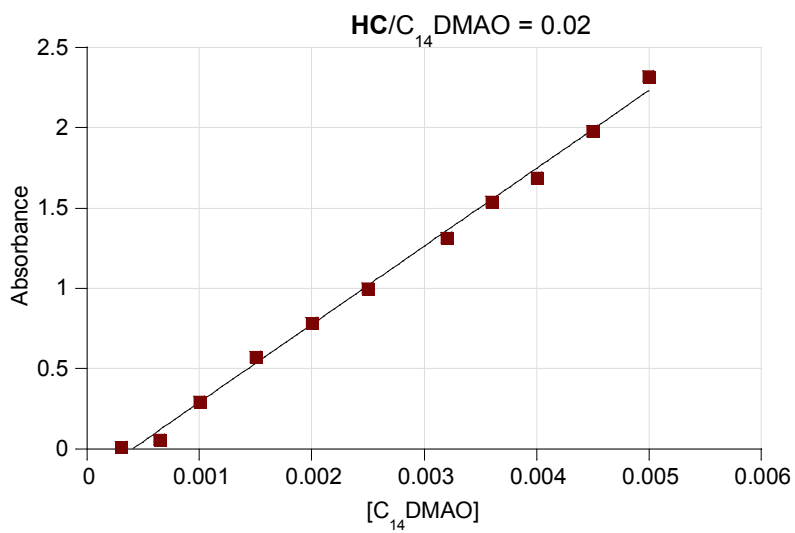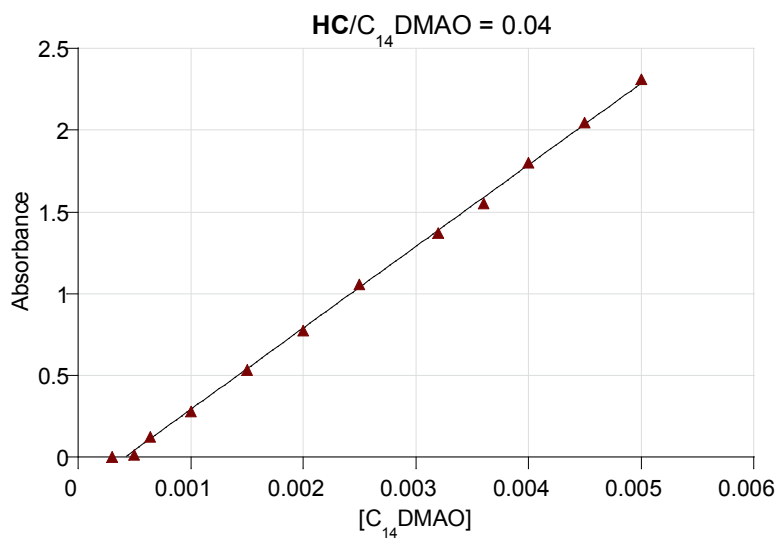

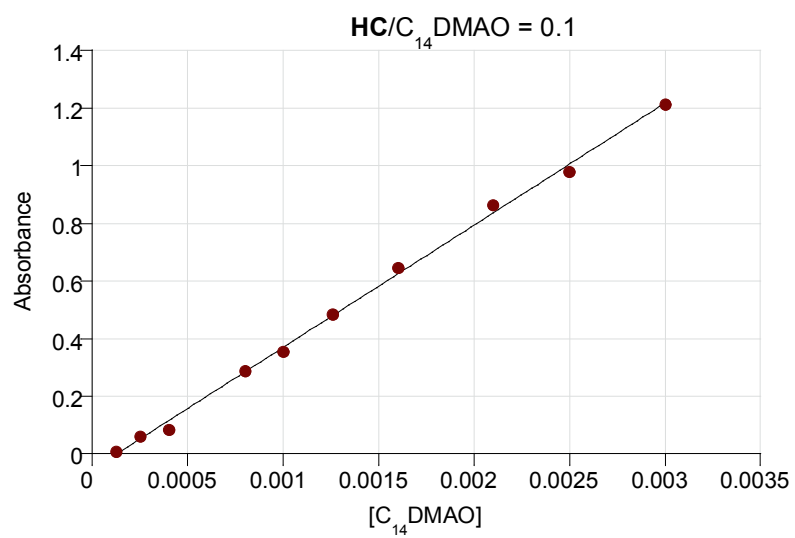

## 1.4 Triton X-100

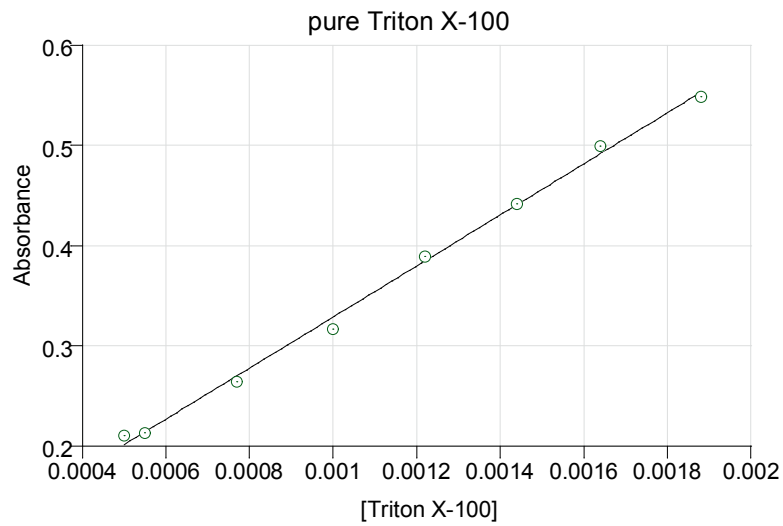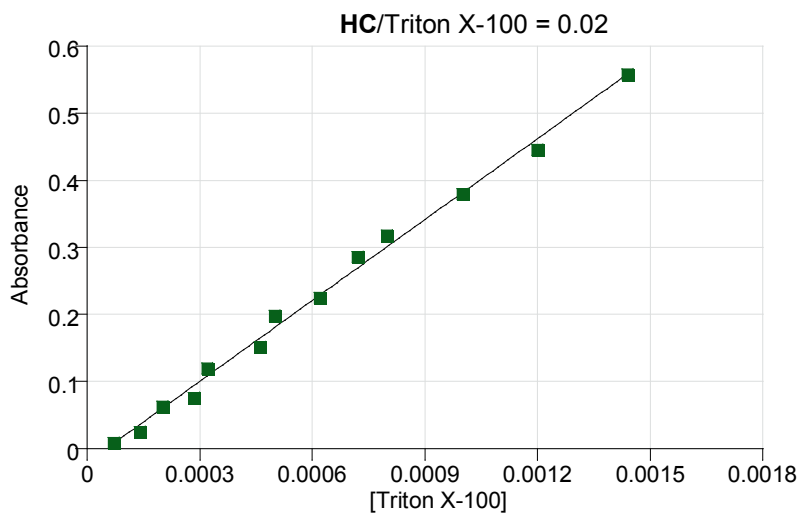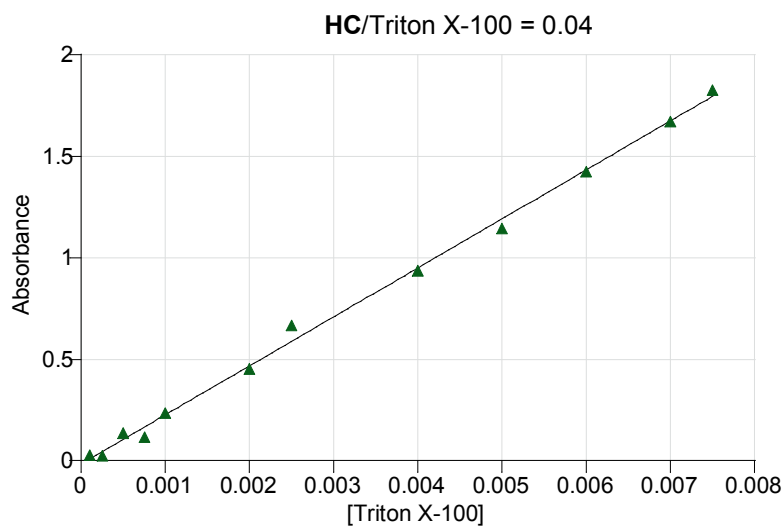



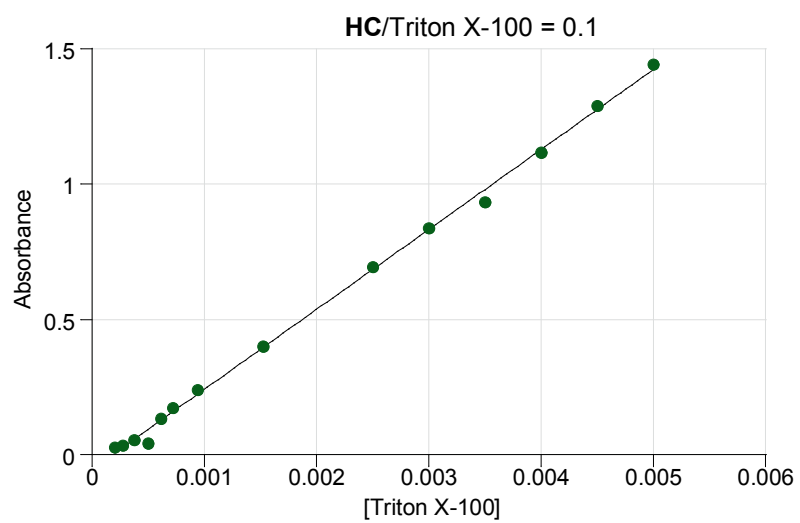

## 2. Surface tension measurements

### 2.1 SDS

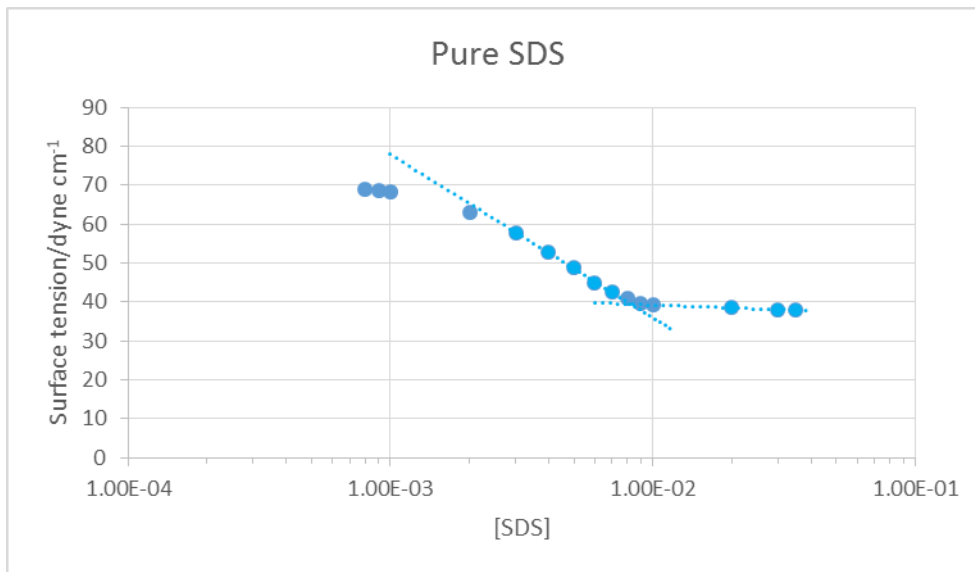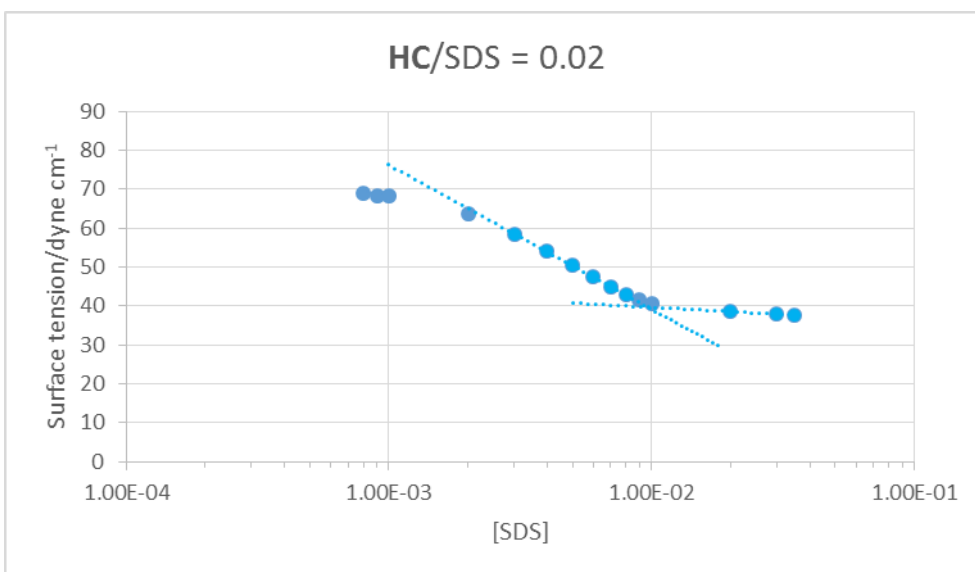

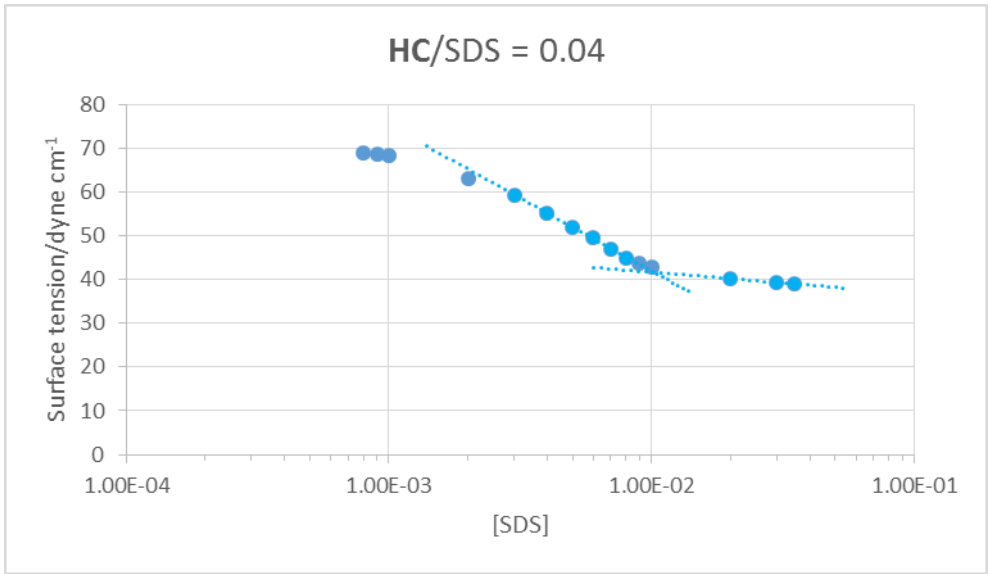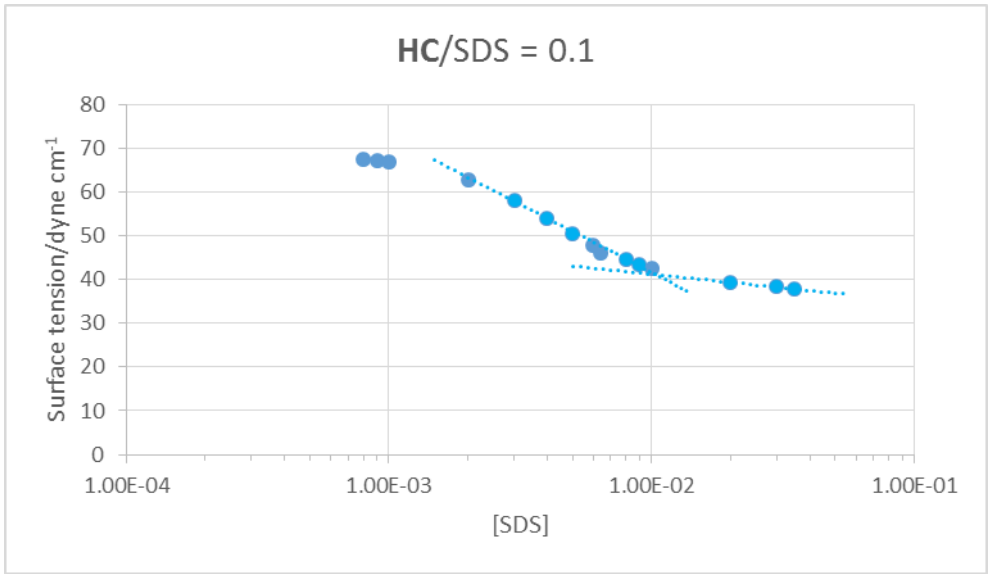

## 2.2 CTAB

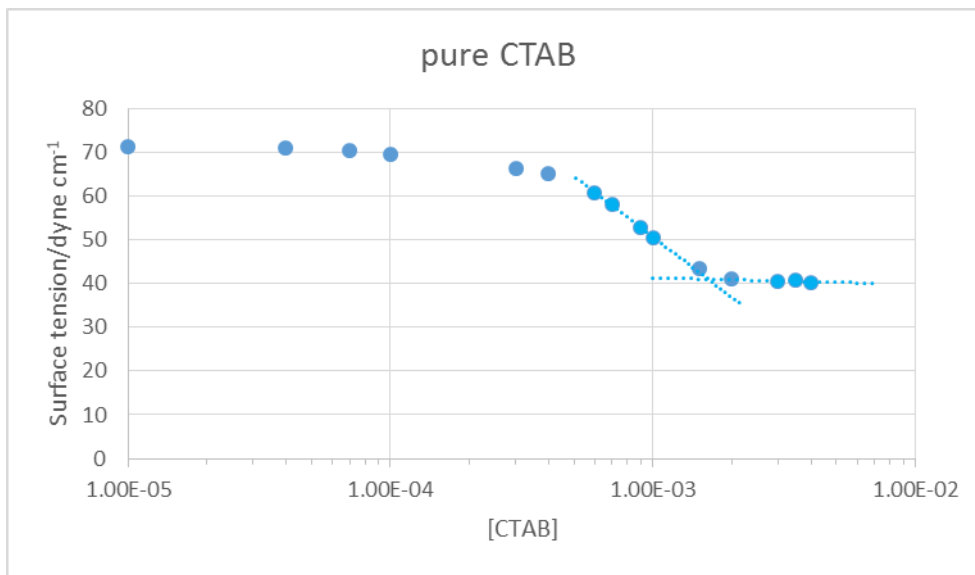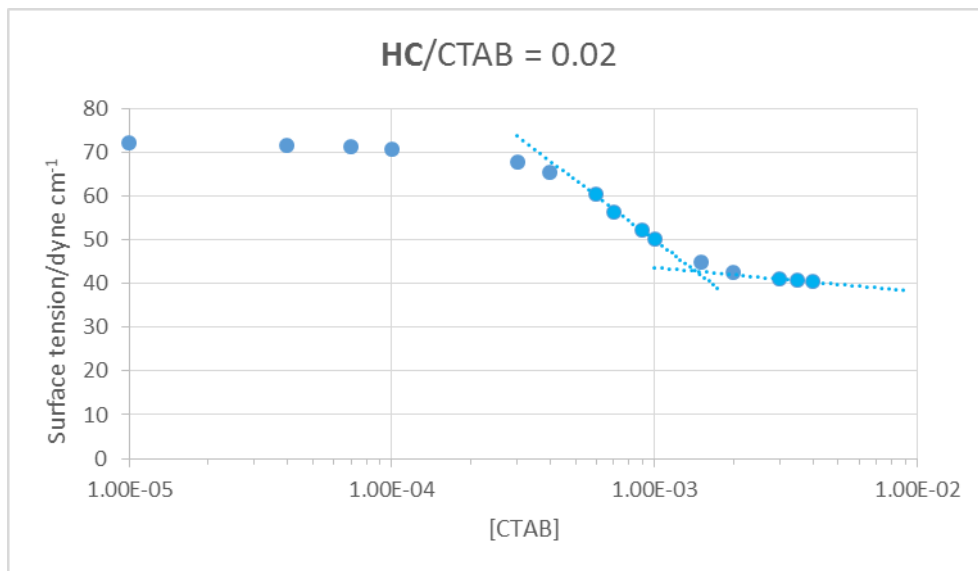

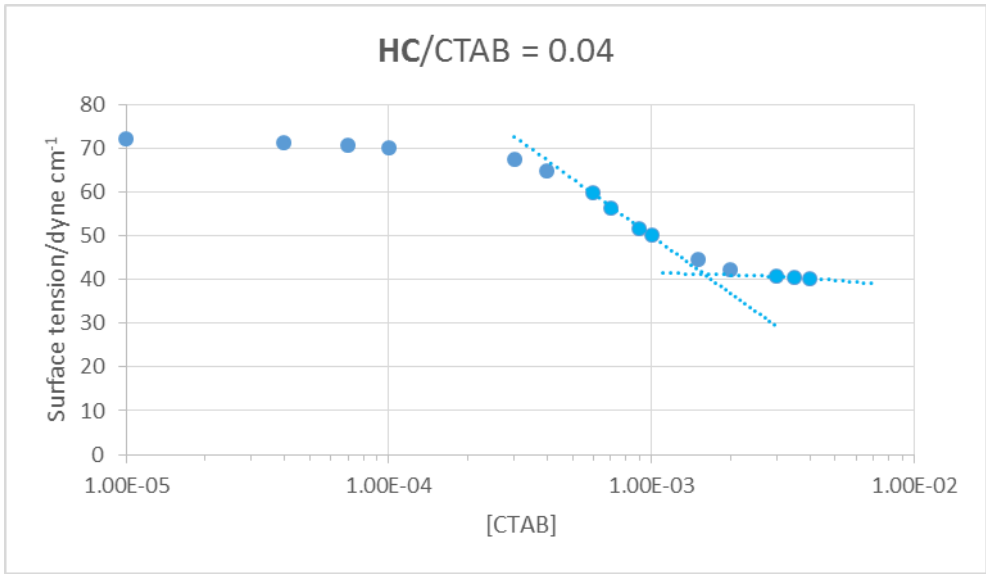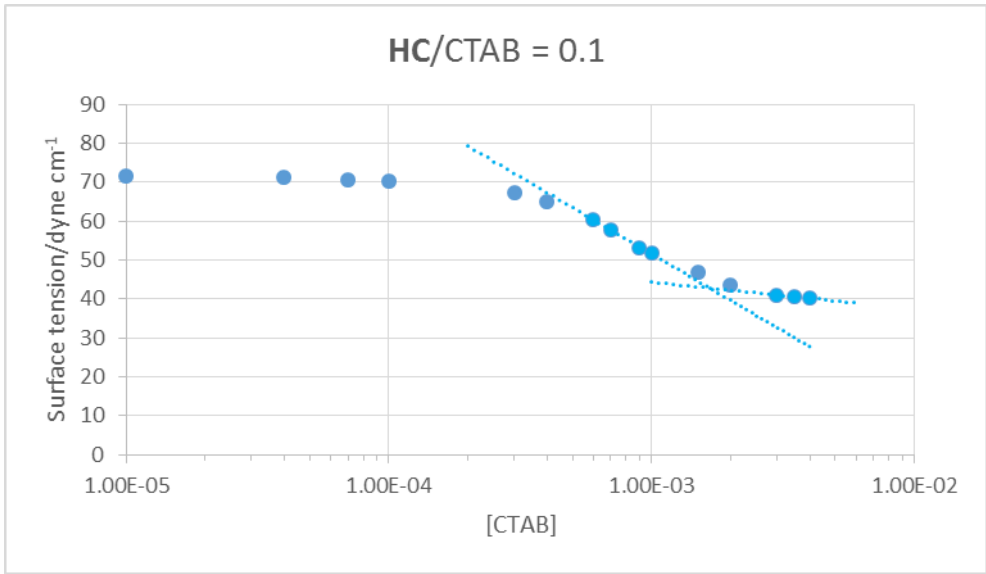

### 2.3 C<sub>14</sub>DMAO

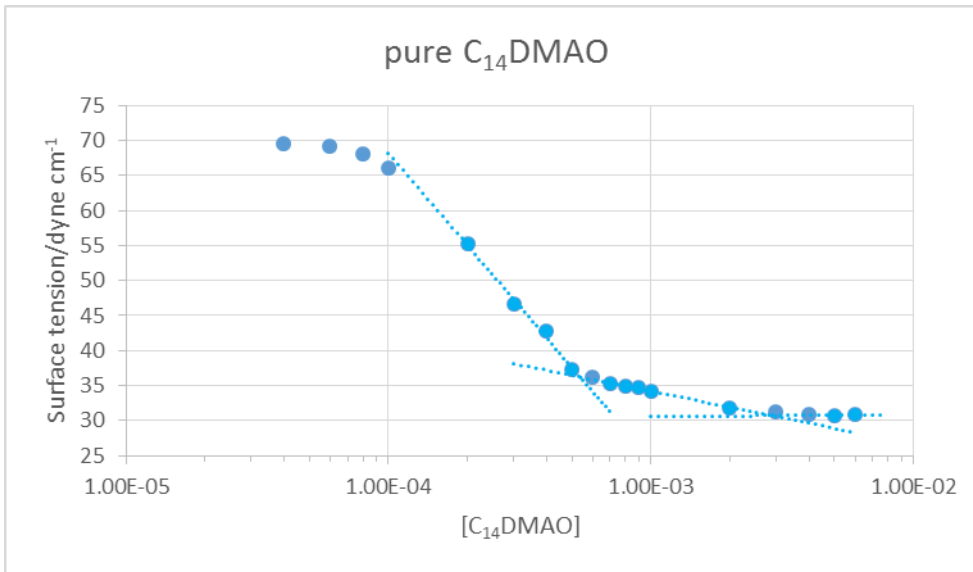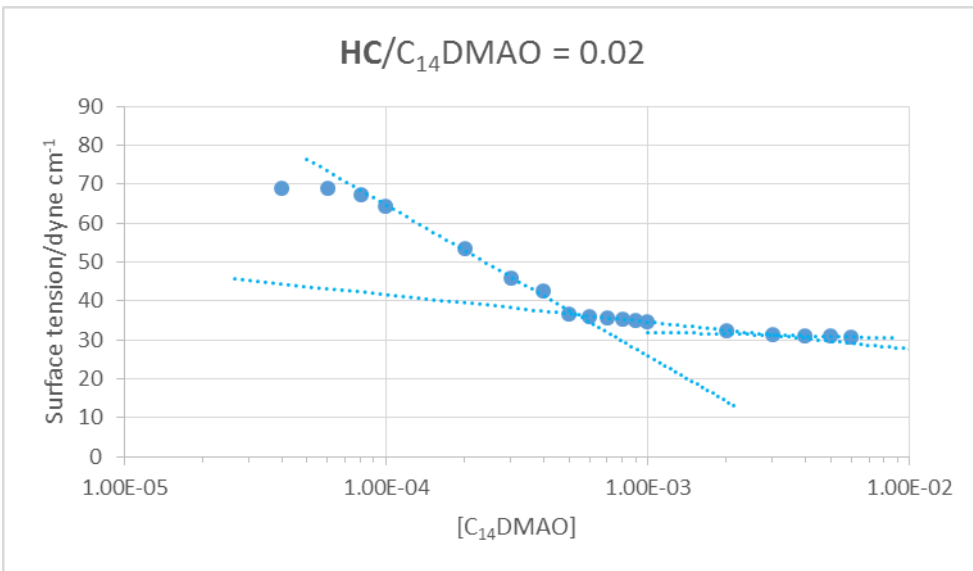

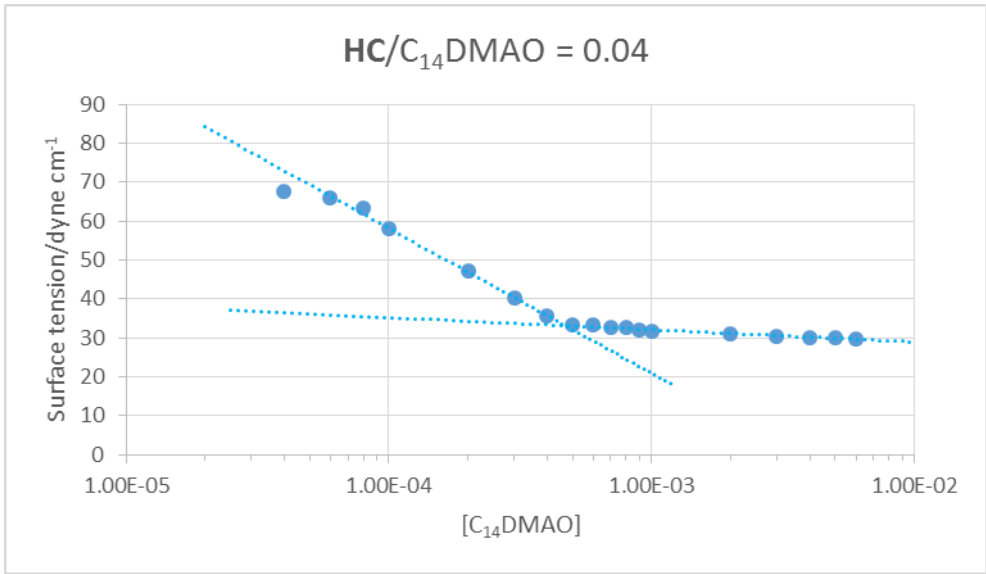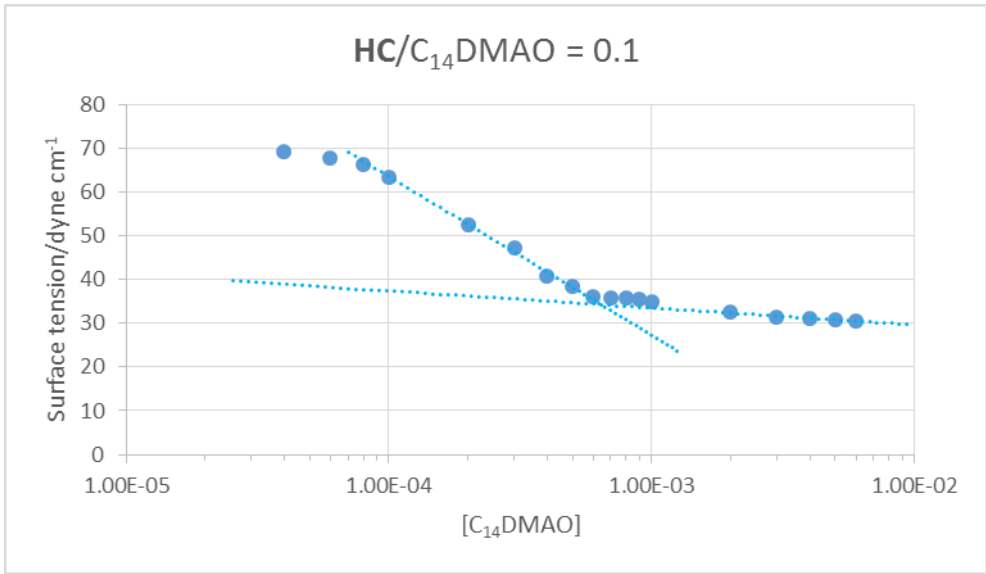

## 2.4 Triton X-100

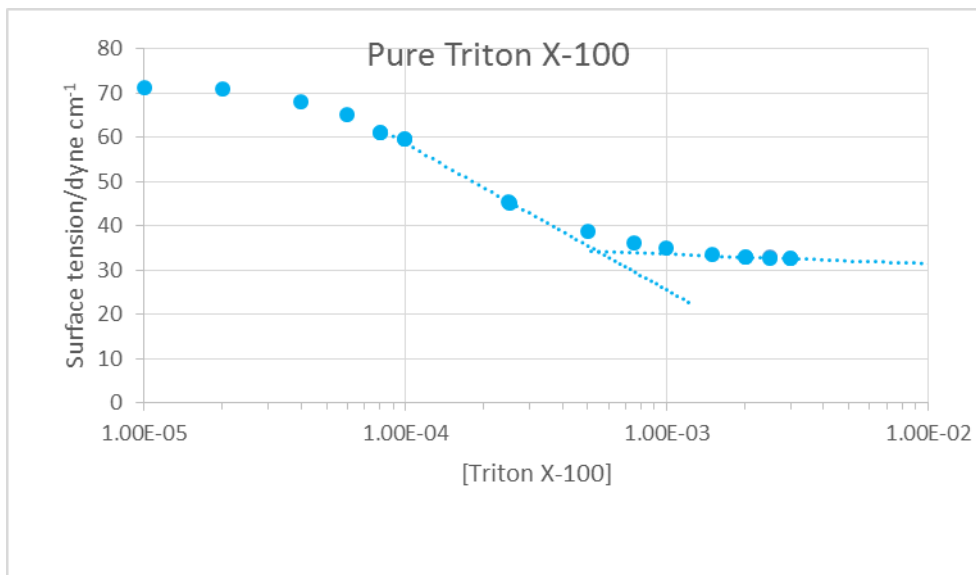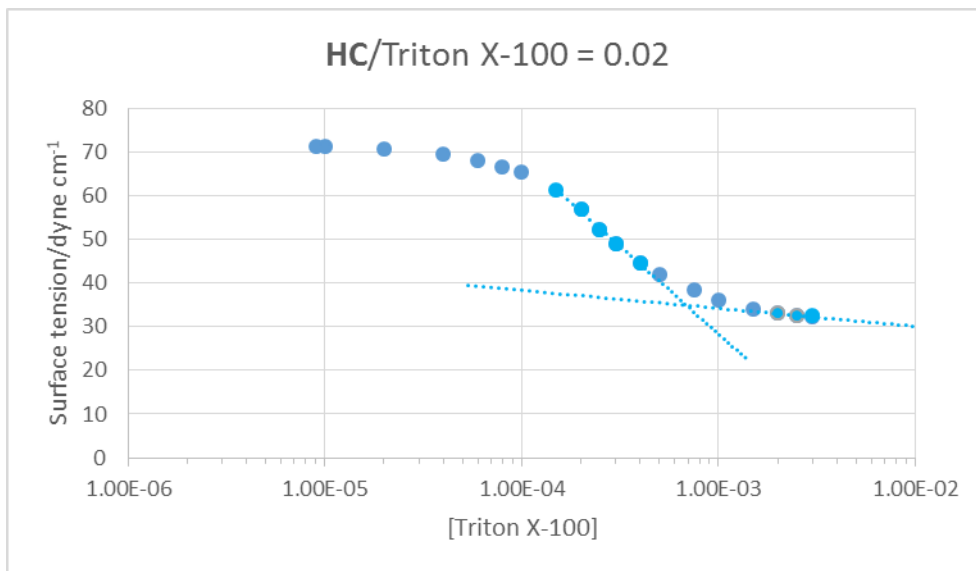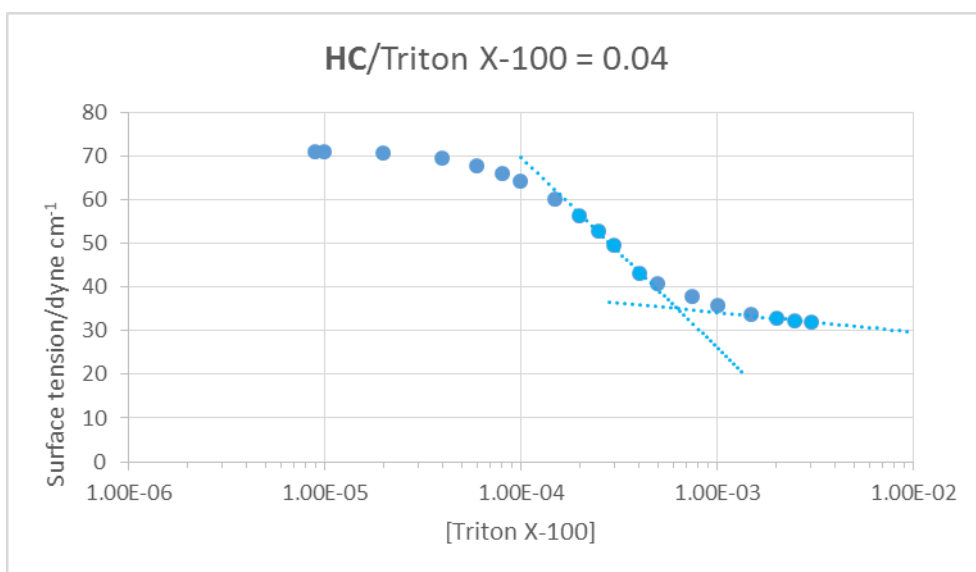



HC/Triton X-100 = 0.1

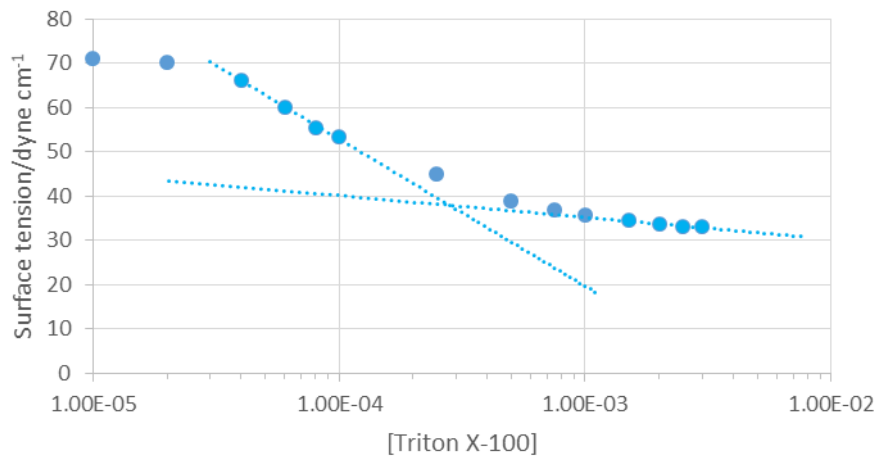

2.5 SDS/Hydrogenated cardanol mixture (HC/SDS = 0.1) in the presence of Orange OT

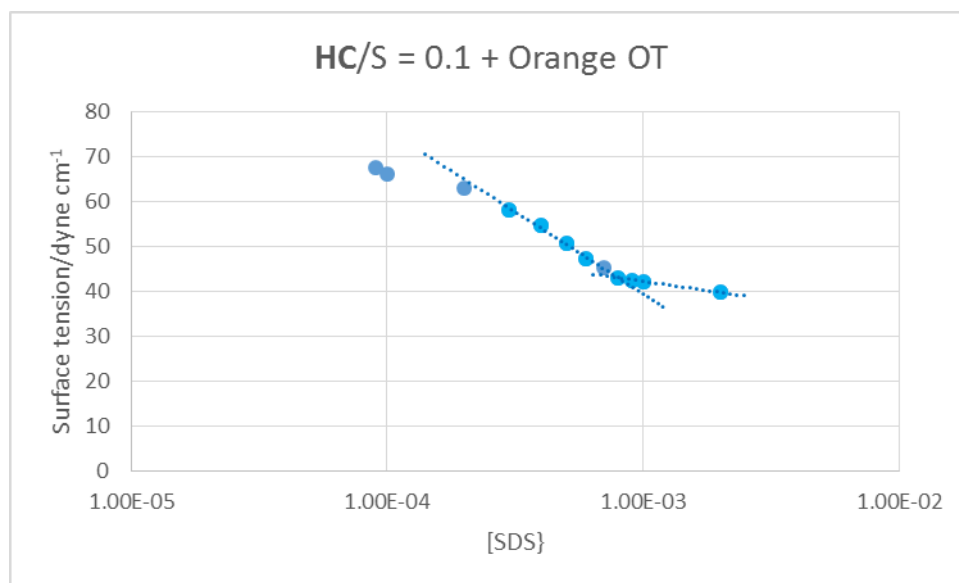

**Table S1.** CMC values (M) obtained by surface tensiometry.

| Surfactant                     | Sample 1                                      | Sample 2                                      | Sample 3              |
|--------------------------------|-----------------------------------------------|-----------------------------------------------|-----------------------|
| Pure SDS                       | $9.64 \times 10^{-3}$                         | $8.25 \times 10^{-3}$                         |                       |
| HC/SDS = 0.02                  | $9.48 \times 10^{-3}$                         | $9.66 \times 10^{-3}$                         |                       |
| HC/SDS = 0.04                  | $1.02 \times 10^{-2}$                         | $9.80 \times 10^{-3}$                         |                       |
| HC/SDS = 0.1                   | $1.01 \times 10^{-2}$                         | $1.04 \times 10^{-2}$                         |                       |
| Pure CTAB                      | $1.36 \times 10^{-3}$                         | $1.73 \times 10^{-3}$                         | $1.62 \times 10^{-3}$ |
| HC/CTAB = 0.02                 | $1.46 \times 10^{-3}$                         | $1.43 \times 10^{-3}$                         | $1.44 \times 10^{-3}$ |
| HC/CTAB = 0.04                 | $2.18 \times 10^{-3}$                         | $1.50 \times 10^{-3}$                         | $1.56 \times 10^{-3}$ |
| HC/CTAB = 0.1                  | $1.85 \times 10^{-3}$                         | $1.28 \times 10^{-3}$                         | $1.67 \times 10^{-3}$ |
| Pure C <sub>14</sub> DMAO      | $5.38 \times 10^{-4}$ ; $2.88 \times 10^{-3}$ | $5.58 \times 10^{-4}$ ; $2.49 \times 10^{-3}$ |                       |
| HC/C <sub>14</sub> DMAO = 0.02 | $5.32 \times 10^{-4}$ ; $3.02 \times 10^{-3}$ | $4.61 \times 10^{-4}$ ; $2.28 \times 10^{-3}$ |                       |
| HC/C <sub>14</sub> DMAO = 0.04 | $4.70 \times 10^{-4}$                         | $4.55 \times 10^{-4}$                         |                       |
| HC/C <sub>14</sub> DMAO = 0.1  | $6.44 \times 10^{-4}$                         | $5.84 \times 10^{-4}$                         |                       |
| Pure Triton X-100              | $5.48 \times 10^{-4}$                         | $4.80 \times 10^{-4}$                         | $6.37 \times 10^{-4}$ |
| HC/Triton X-100 = 0.02         | $6.03 \times 10^{-4}$                         | $6.03 \times 10^{-4}$                         | $6.87 \times 10^{-4}$ |
| HC/Triton X-100 = 0.04         | $6.07 \times 10^{-4}$                         | $7.10 \times 10^{-4}$                         | $6.24 \times 10^{-4}$ |
| HC/Triton X-100 = 0.1          | $5.51 \times 10^{-4}$                         | $6.18 \times 10^{-4}$                         | $7.03 \times 10^{-4}$ |

### 3. DLS traces and correlation functions

#### 3.1 SDS $3 \times 10^{-2}$ M

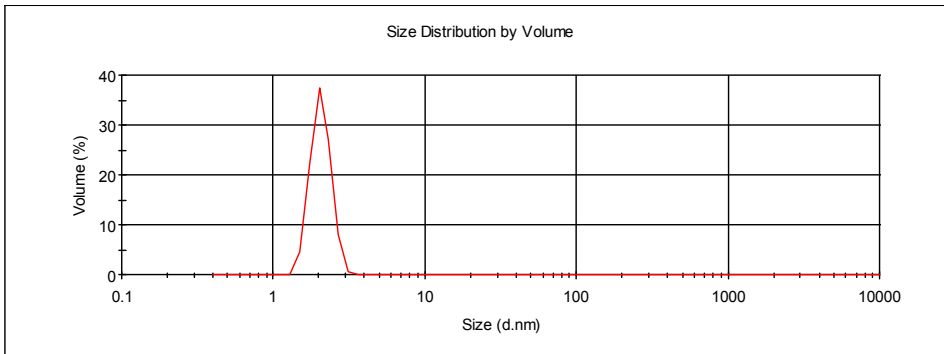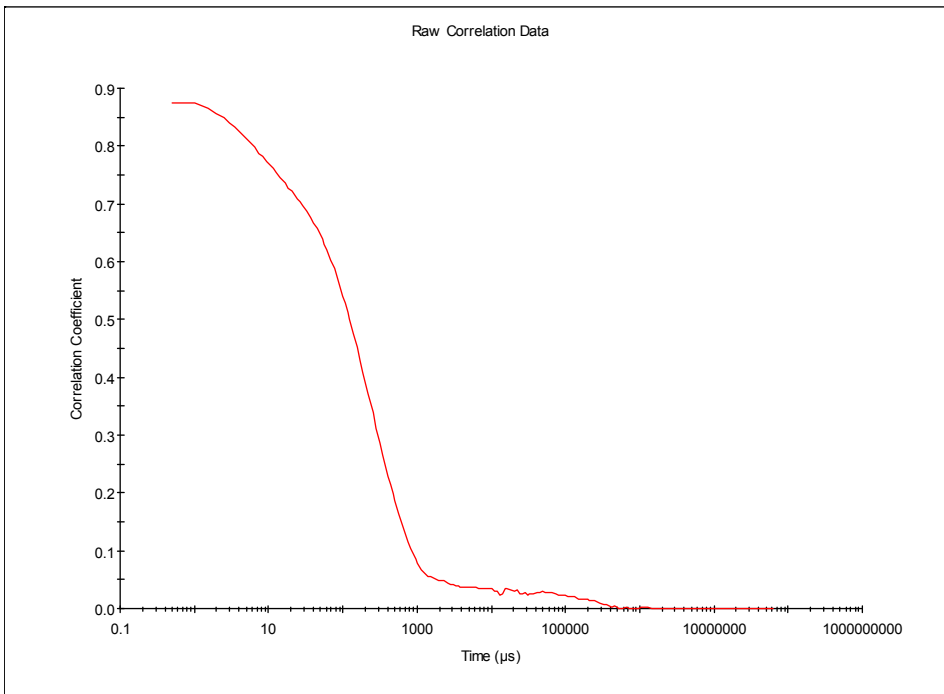

### 3.2 HC/SDS 0.1, SDS $1 \times 10^{-2}$ M

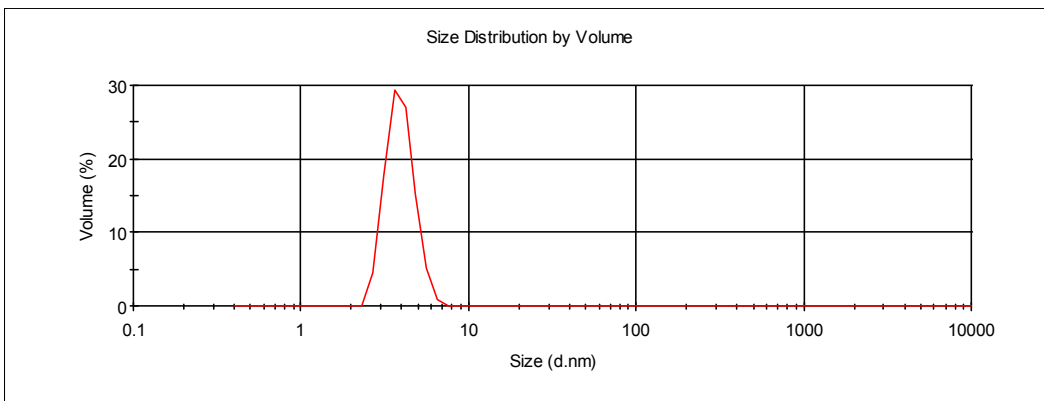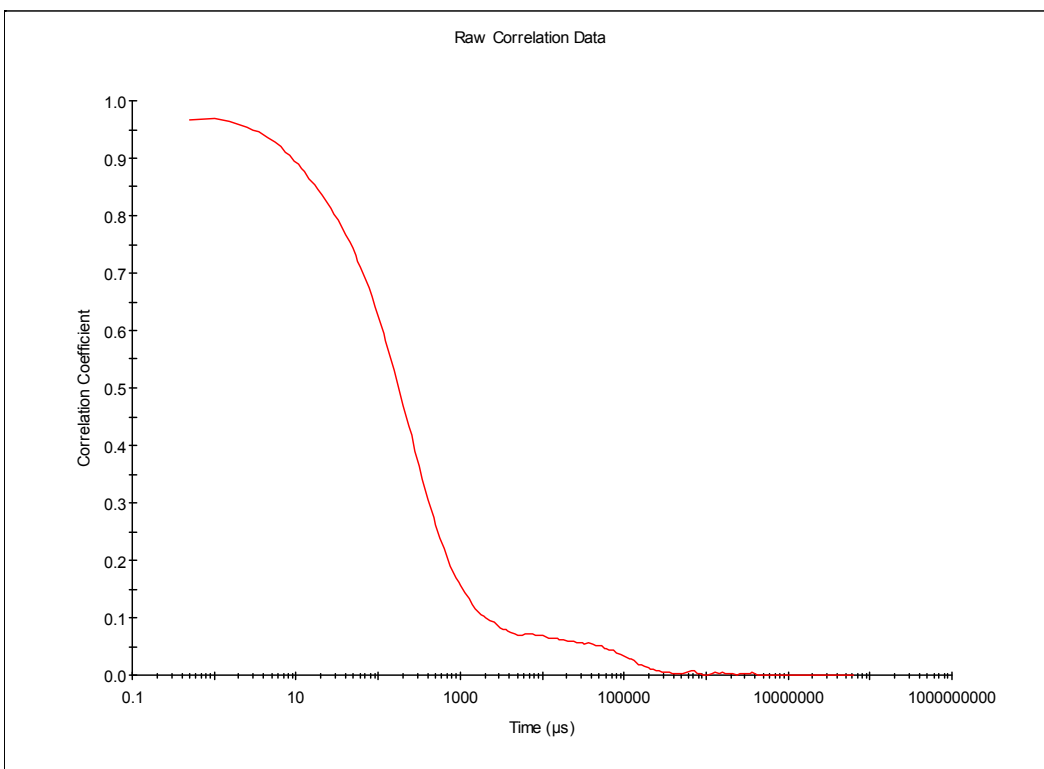

3.3 CTAB  $1 \times 10^{-3}$  M

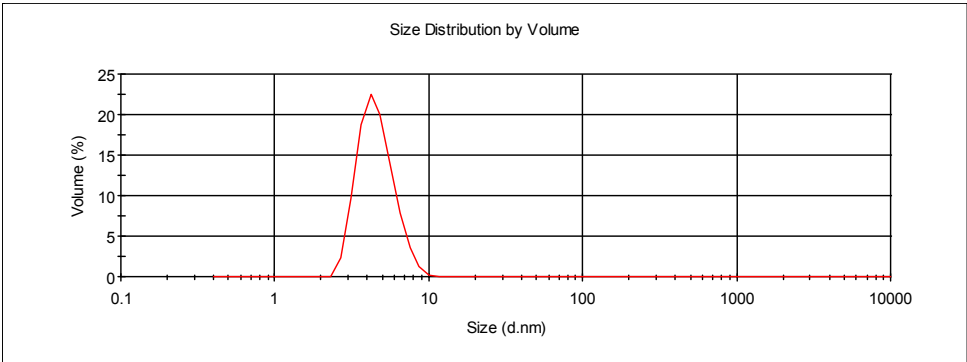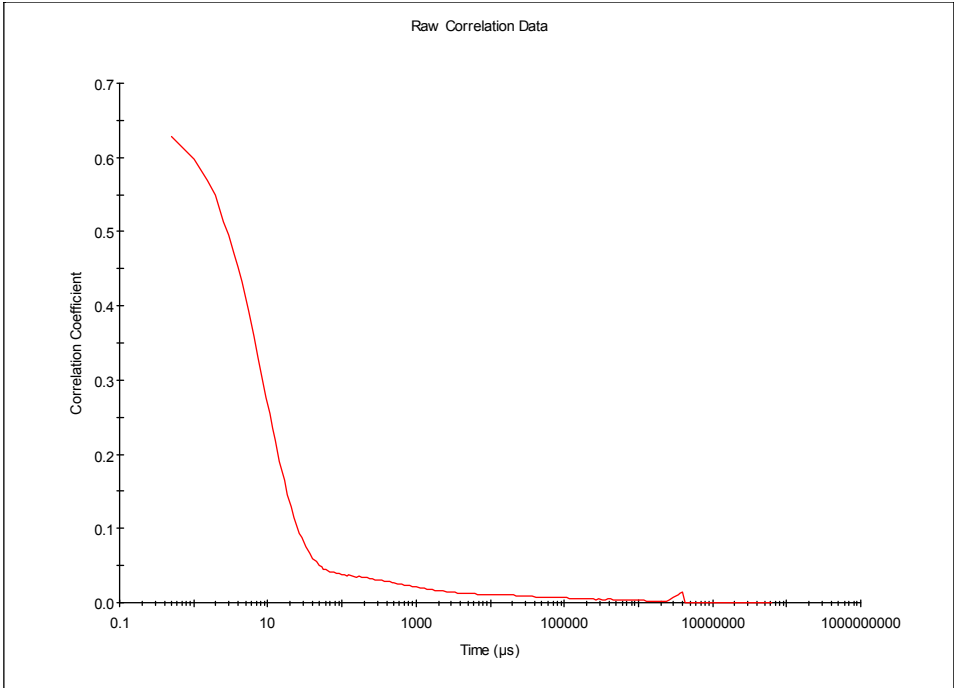

### 3.4 HC/CTAB 0.1, CTAB $1 \times 10^{-3}$ M

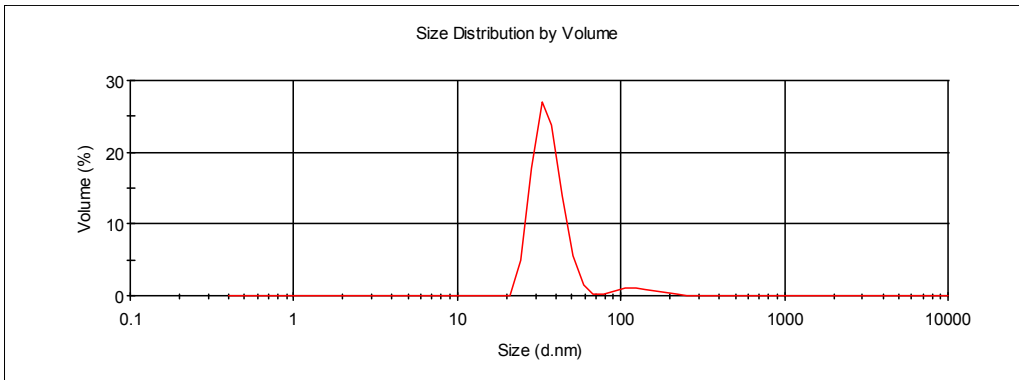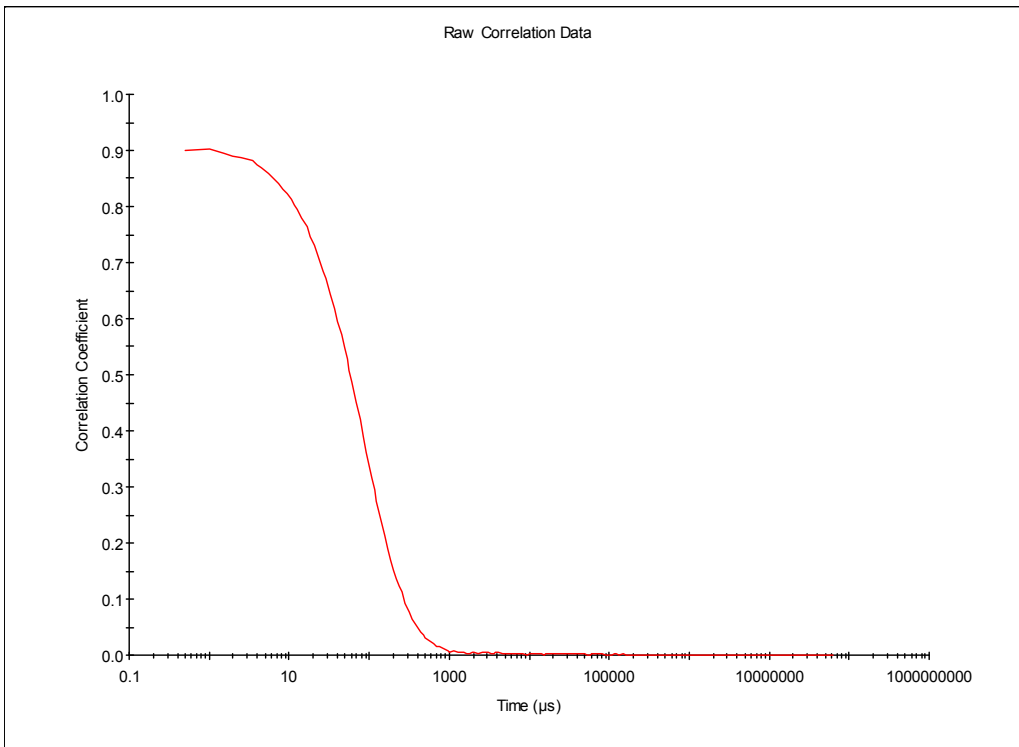

3.5 C<sub>14</sub>DMAO 1×10<sup>-3</sup> M

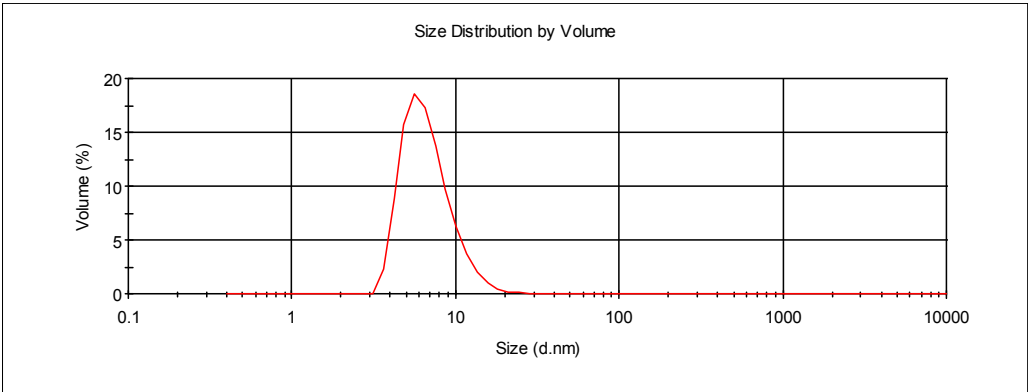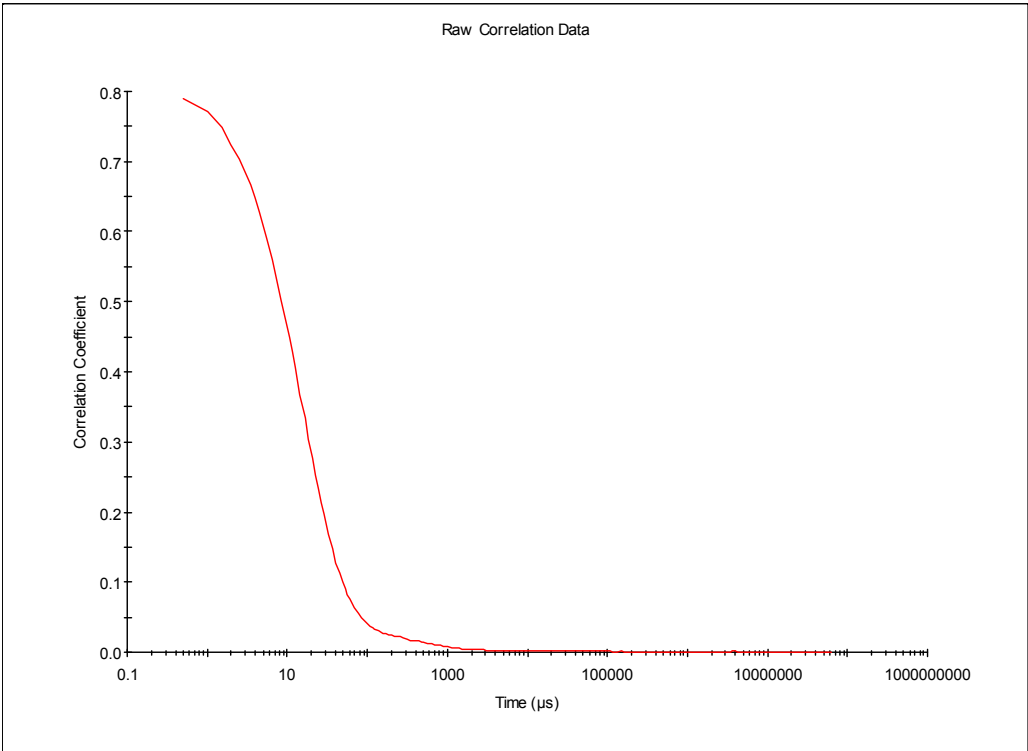



3.6 HC/ C<sub>14</sub>DMAO 0.1, C<sub>14</sub>DMAO 1×10<sup>-3</sup> M

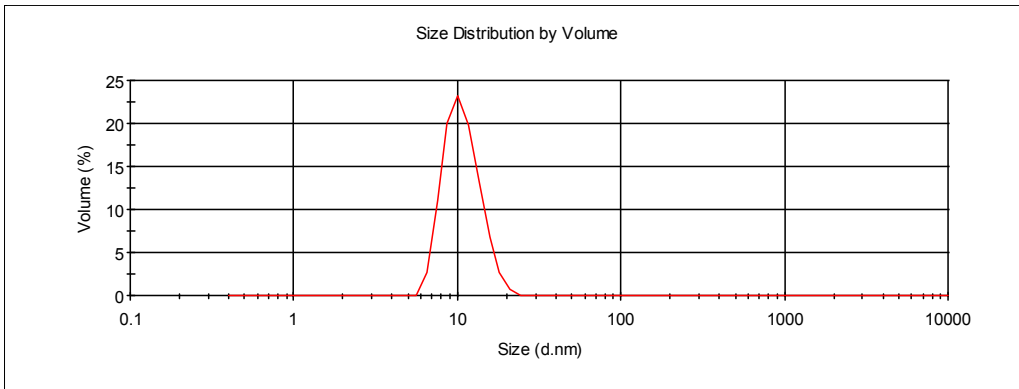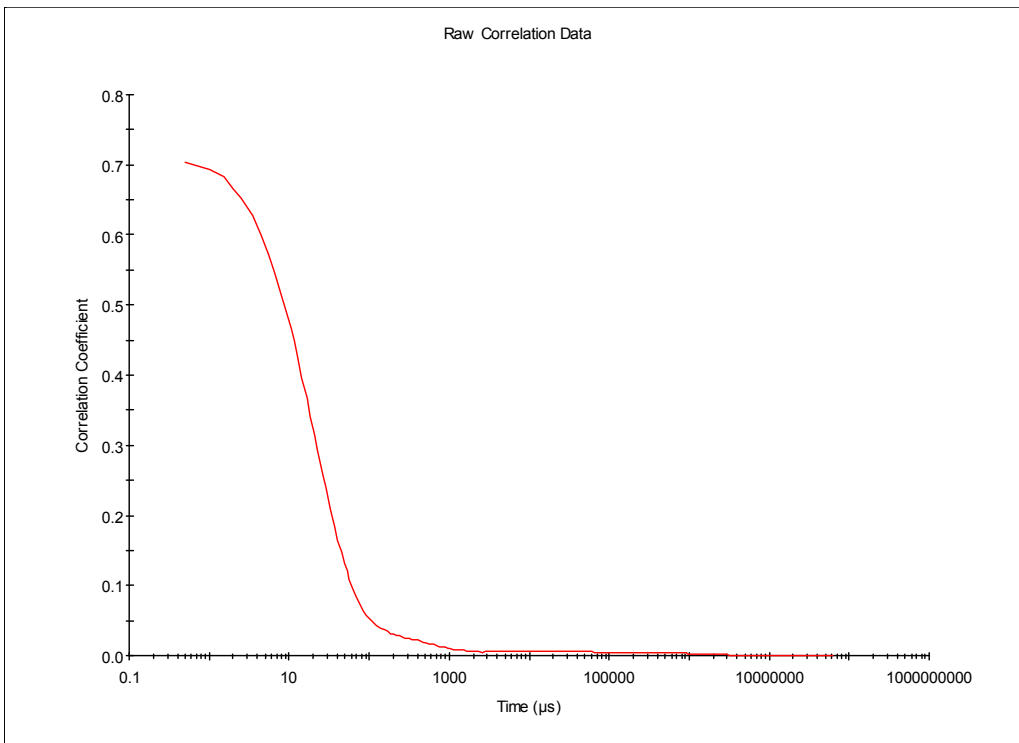

### 3.7 Triton X-100 $1 \times 10^{-2}$ M

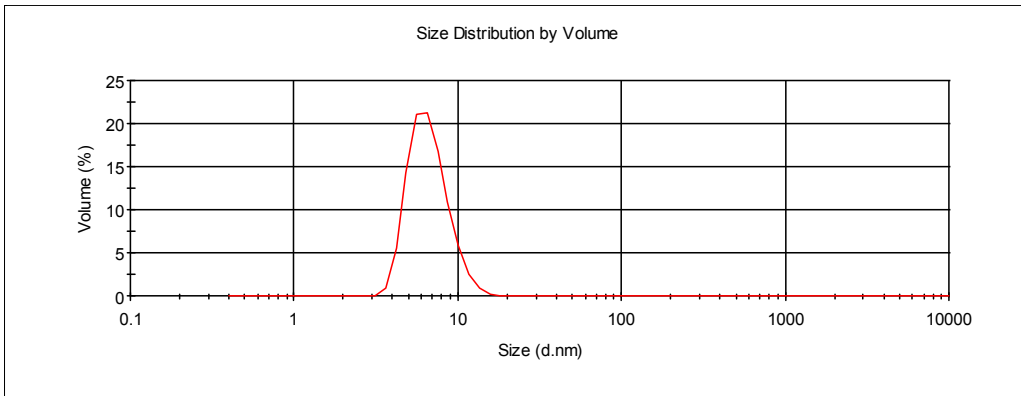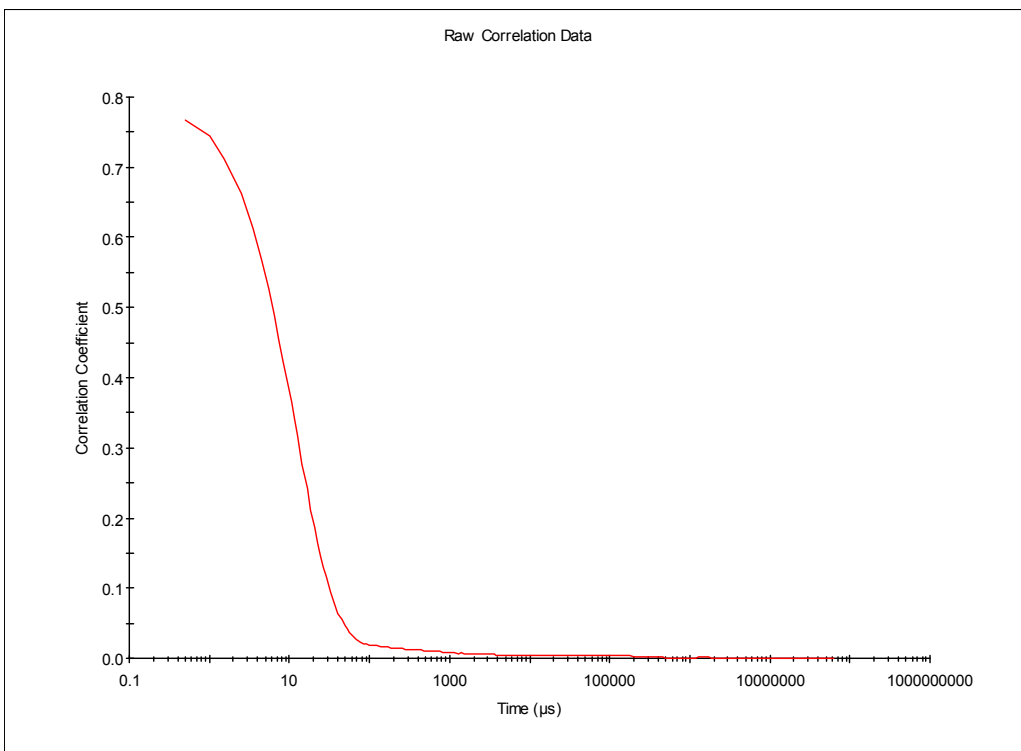

### 3.8 HC/Triton X-100 0.1, Triton X-100 $1 \times 10^{-2}$ M

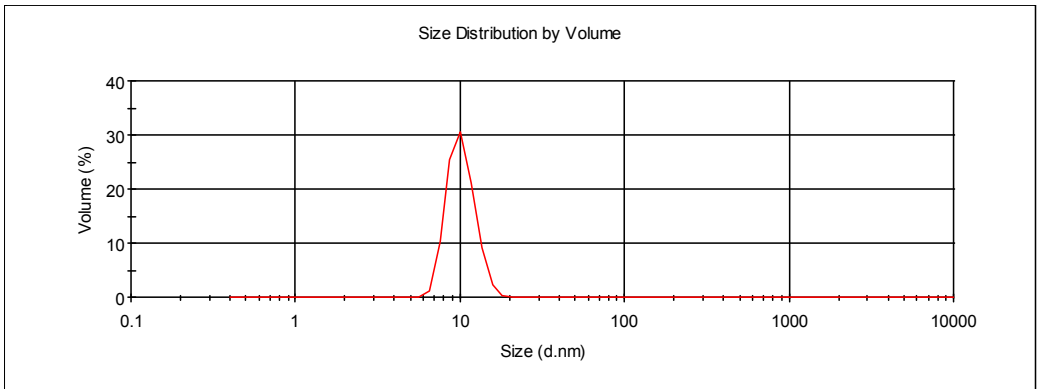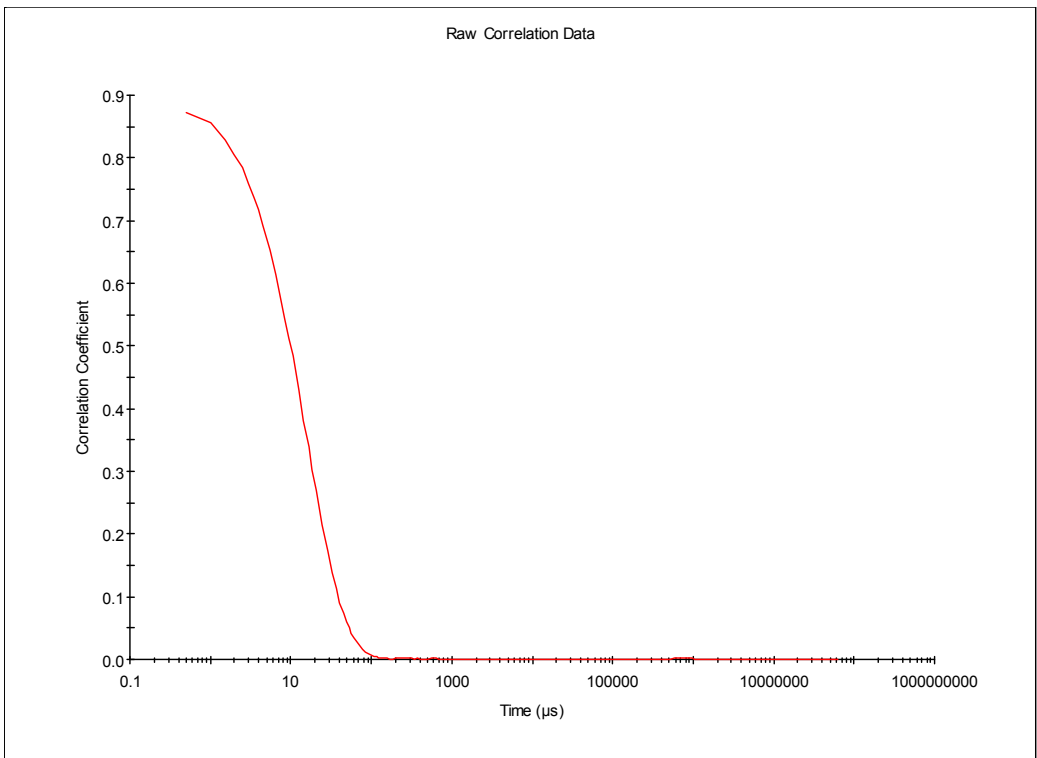

Supplement: c5ob01059d1.pdf [file c5ob01059d1.pdf]
